# Supplementary material for: Photoinitiated Cationic Ring-Opening Polymerization of Octamethylcyclotetrasiloxane
Source: MDPI journal article supplement (doi:10.3390/molecules28031299), 2023-01-29
Supplement: s1 [file s1]

# Photoinitiated Cationic Ring-Opening Polymerization of Octamethylcyclotetrasiloxane

Zehra Gul Coban, Huseyin Cem Kiliclar and Yusuf Yagci \*

Department of Chemistry, Istanbul Technical University, 34469 Maslak, Turkey; cobanz19@itu.edu.tr (Z.G.C.); kiliclar@itu.edu.tr (H.C.K.)

\* Correspondence: yusuf@itu.edu.tr; Tel.: +90-212-285-32-41

## Details of the mathematical modelling in Figure 2

|          |                 |                       |
|----------|-----------------|-----------------------|
| <b>a</b> | Model           | Asymptotic1           |
|          | Equation        | $y = a - b \cdot c^x$ |
|          | Plot            | reduced visc.         |
|          | a               | $9,33997 \pm 1,1793$  |
|          | b               | $9,94589 \pm 1,86916$ |
|          | c               | $0,81979 \pm 0,06821$ |
|          | Reduced Chi-Sqr | 2,56405               |
|          | R-Square(COD)   | 0,90433               |
|          | Adj. R-Square   | 0,84055               |

|          |                 |                       |
|----------|-----------------|-----------------------|
| <b>b</b> | Model           | Asymptotic1           |
|          | Equation        | $y = a - b \cdot c^x$ |
|          | Plot            | reduced visc.         |
|          | a               | $7,82838 \pm 1,24588$ |
|          | b               | $8,13362 \pm 1,52971$ |
|          | c               | $0,88566 \pm 0,05236$ |
|          | Reduced Chi-Sqr | 1,60887               |
|          | R-Square(COD)   | 0,90693               |
|          | Adj. R-Square   | 0,84488               |

|          |                 |                       |
|----------|-----------------|-----------------------|
| <b>c</b> | Model           | Asymptotic1           |
|          | Equation        | $y = a - b \cdot c^x$ |
|          | Plot            | reduced visc.         |
|          | a               | $8,34118 \pm 0,29399$ |
|          | b               | $8,3699 \pm 0,48798$  |
|          | c               | $0,79125 \pm 0,02419$ |
|          | Reduced Chi-Sqr | 0,17573               |
|          | R-Square(COD)   | 0,98993               |
|          | Adj. R-Square   | 0,98321               |

|          |                 |                       |
|----------|-----------------|-----------------------|
| <b>d</b> | Model           | Asymptotic1           |
|          | Equation        | $y = a - b \cdot c^x$ |
|          | Plot            | reduced viscosity     |
|          | a               | $8,8086 \pm 1,10594$  |
|          | b               | $9,07899 \pm 1,21662$ |
|          | c               | $0,90038 \pm 0,03501$ |
|          | Reduced Chi-Sqr | 0,93036               |
|          | R-Square(COD)   | 0,95339               |
|          | Adj. R-Square   | 0,92232               |

**Figure S1.** Details of exponential curve fitting for (a) PDMS-1, (b) PDMS-2, (c) PDMS-3 and (d) PDMS-4.
